# Supplementary material for: CD73-Positive Cell Spheroid Transplantation Attenuates Colonic Atrophy
Source: MDPI journal article supplement (doi:10.3390/pharmaceutics15030845), 2023-03-04
Supplement: s1 [file s1]

# Supplementary Materials: CD73-Positive Cell Spheroid Transplantation Attenuates Colonic Atrophy

Daisuke Hisamatsu, Natsumi Itakura, Yo Mabuchi, Rion Ozaki, Eriko Grace Suto, Yuna Naraoka, Akari Ikeda, Lisa Ito, and Chihiro Akazawa

## Supplementary Figures

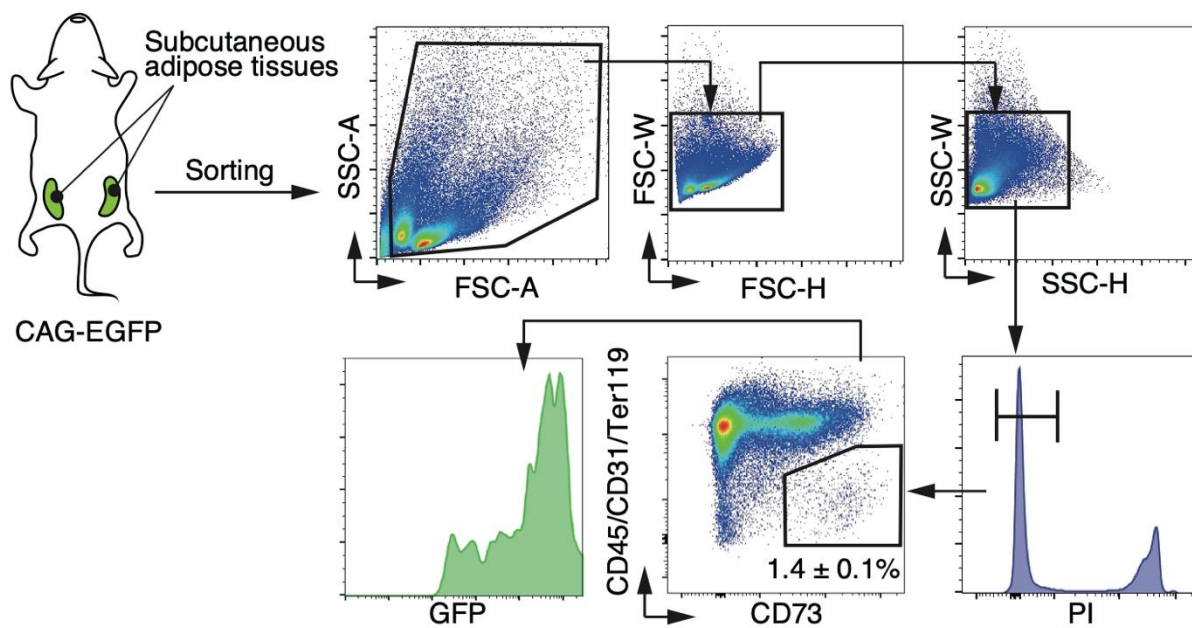

**Figure S1.** Representative FACS plots, representing the isolation of adipose-derived CD73<sup>+</sup> cells from mouse subcutaneous fat ( $n = 3$  mice).

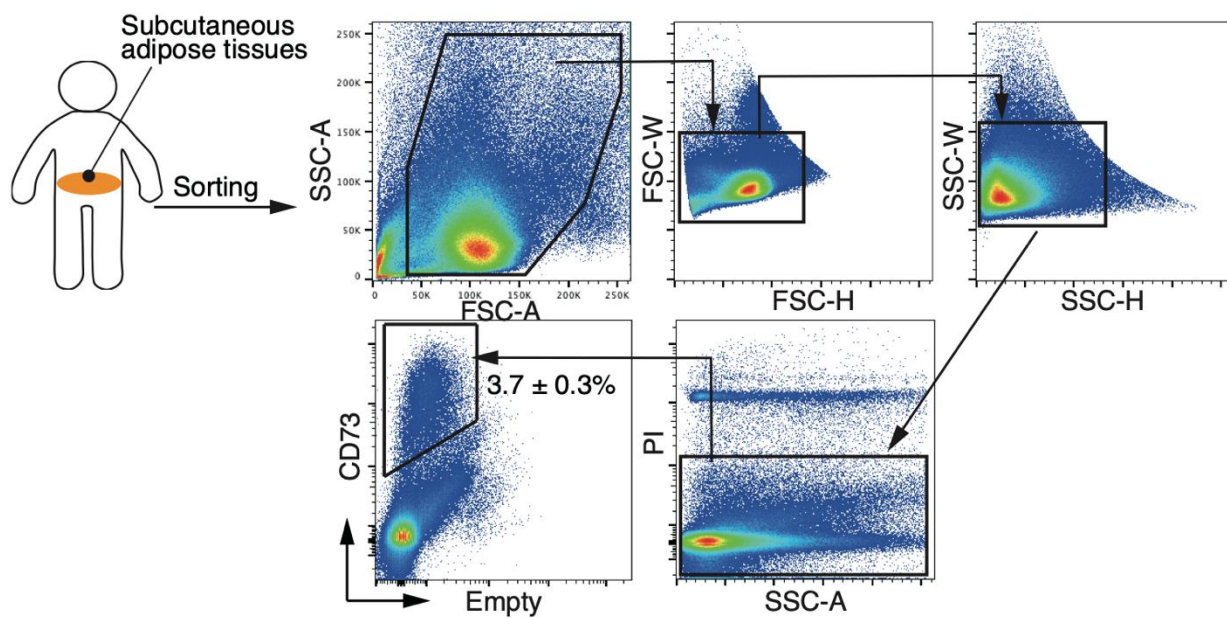

**Figure S2.** Representative FACS plots, representing the isolation of CD73<sup>+</sup> cells from human adipose tissue ( $n = 3$  specimens).

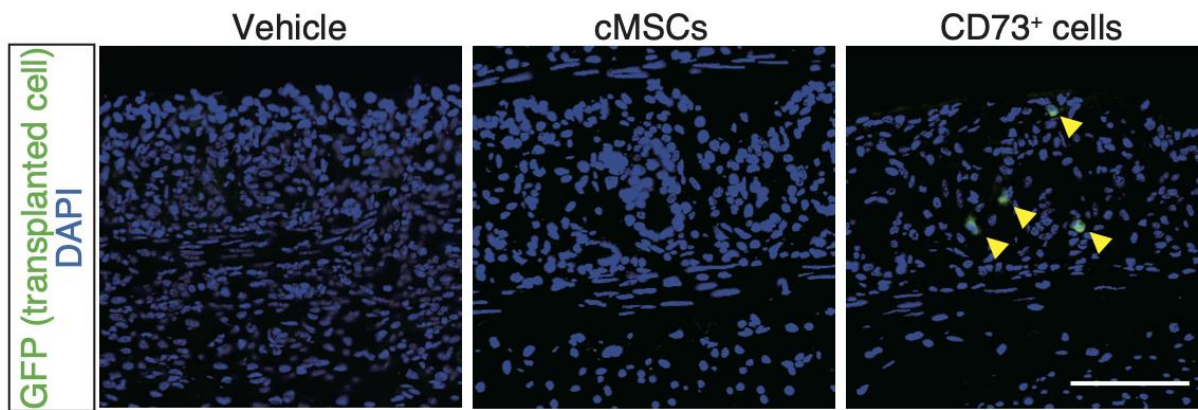

**Figure S3.** Transplanted cell engraftment by intravenous injection. Representative immunohistochemistry images of GFP<sup>+</sup>-transplanted cells after intravenous injection. Arrowheads indicate transplanted cells. No cell engraftment was observed in the PBS-treated and cMSC-transplanted groups. Vehicle: PBS-treated group; cMSCs: cMSC-transplanted group; CD73<sup>+</sup> cells: CD73<sup>+</sup> cell-transplanted group. Scale bar: 100  $\mu$ m.

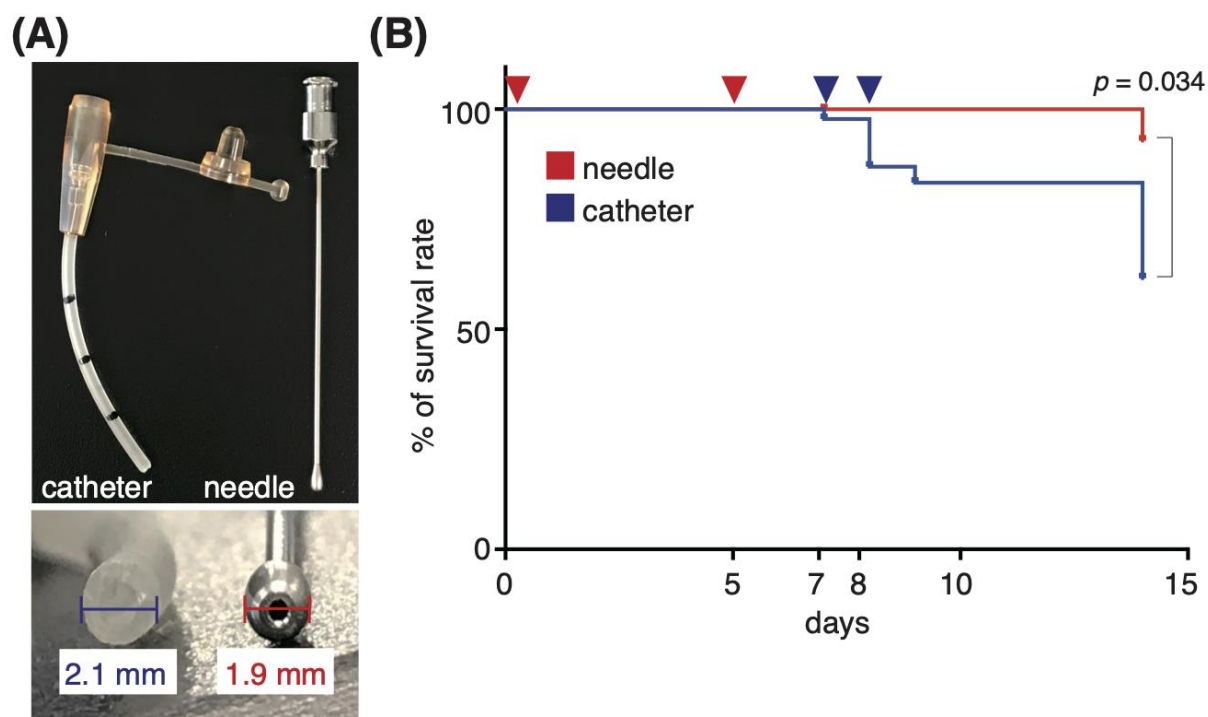

**Figure S4.** Improvement of trans-anal transplantation method. (A) Comparison of a thin, flexible catheter and a stainless steel needle used for cell injection. (B) Survival rate for each method.  $n = 5-6$  mice. Arrowheads indicate transplantation day. Statistical significances were determined using Welch's t-test.

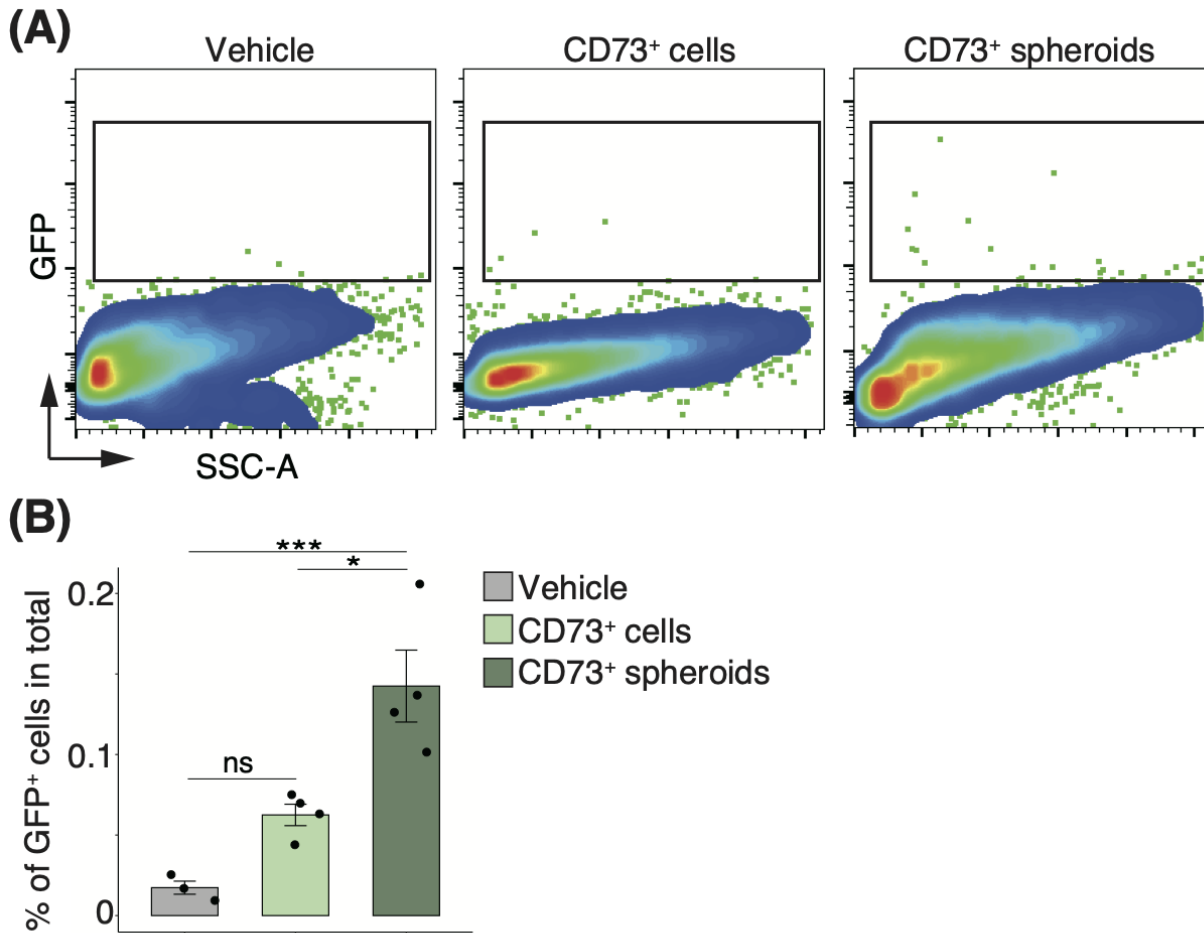

**Figure S5.** 3D culture improves the engraftment of CD73<sup>+</sup> cells into colonic tissue after DSS treatment. (A) Representative FACS plots of GFP<sup>+</sup>-transplanted cells after trans-anal transplantation, using a stainless steel needle. (B) Graph showing the percentage of GFP<sup>+</sup>-transplanted cells. Vehicle: PBS-treated group; CD73<sup>+</sup> cells: CD73<sup>+</sup> 2D cell-transplanted group; CD73<sup>+</sup> spheroids: CD73<sup>+</sup> cell spheroid-transplanted group.  $n = 3-4$  mice. Statistical significances were determined using the Tukey's test. Data are shown as mean  $\pm$  SEM. \* $p < 0.05$ ; \*\*\* $p < 0.005$ ; ns, not significant.

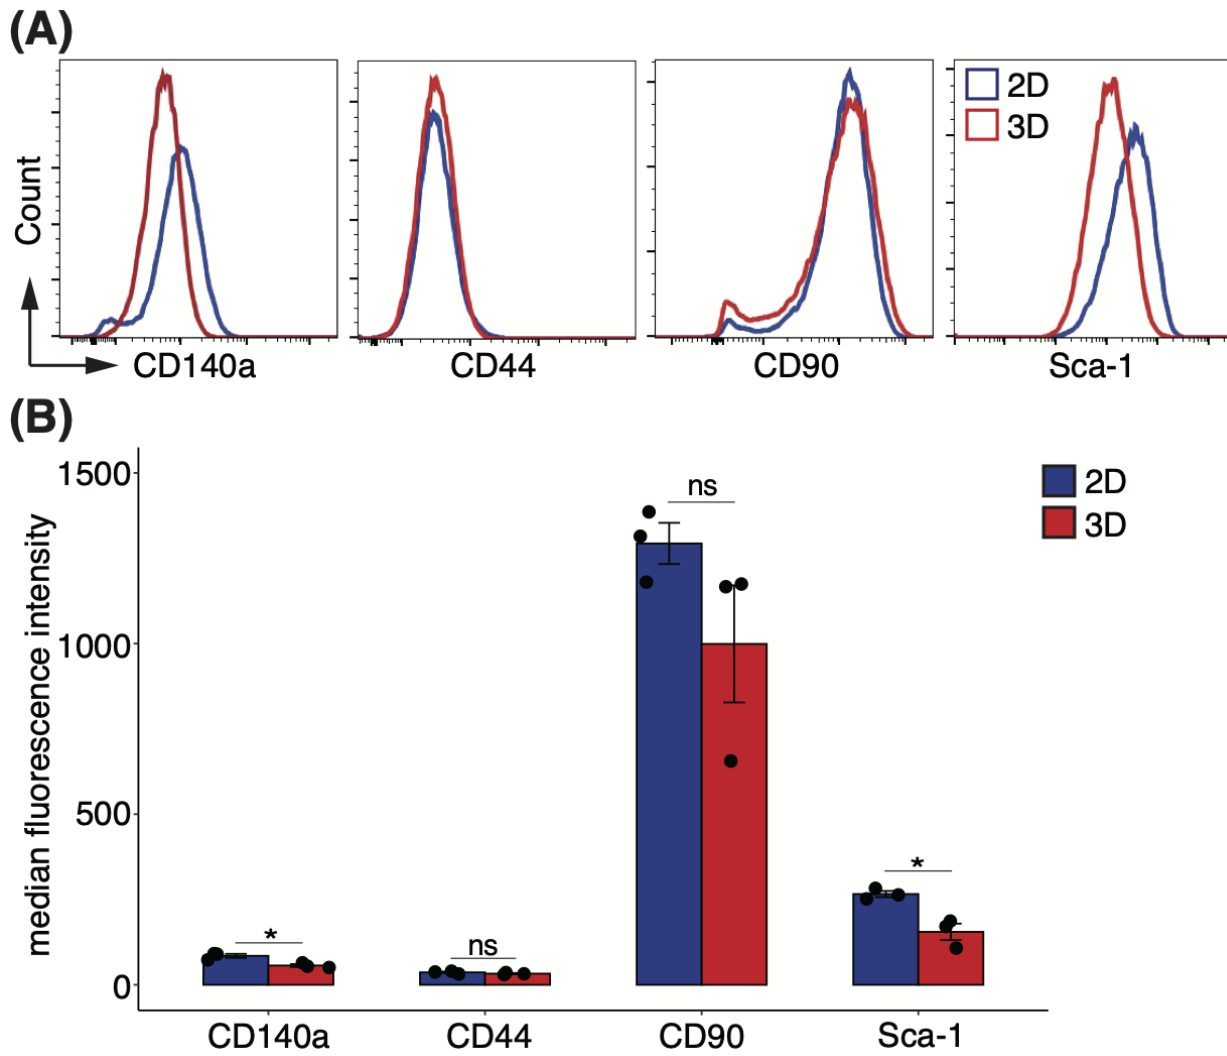

**Figure S6.** Protein expression of MSC markers under 3D culture, determined using FACS analysis. (A) Representative histograms of each MSC marker in CD73<sup>+</sup> 2D cells and 3D spheroids. (B) Graph showing the mean fluorescent intensity of MSC markers.  $n = 4$ . Statistical significances were determined using Welch's t-test. Data shown as mean  $\pm$  SEM. \* $p < 0.05$ . ns, not significant.



**Table S1.** Mouse qPCR primers sequences used in the present study.

| Gene     | Forward                  | Reverse                  |
|----------|--------------------------|--------------------------|
| Ago2     | TCCCAGGATATGCCTTCAAA     | TAAAGTGCTGGACCATGTGC     |
| Axin2    | AGAAGCGACCCAGTCAATCC     | TTACTCCCCATGCGGTAAGG     |
| Bmp-2    | TAGATCTGTACCGCAGGCACTC   | CTGCAGATGTGAGAACTCGTC    |
| Col1a1   | ATGTTTCAGCTTTGTGGACCT    | CAGCTGACTTCAGGGATGT      |
| Col4a1   | ATTGTGGTGGCTCTGGCTGT     | GCCAGGAAGTCCAGGTTCTC     |
| Ctgf     | CCACCCGAGTTACCAATGAC     | GCTTGGCGATTITAGGTGTC     |
| Cxcl1    | CAGCCACCCGCTCGCTTCTC     | AGGGAGCTTCAGGGTCAAGG     |
| CyclinD1 | TGGTGAACAAGCTCAAGTGG     | TGGAAGAAAGTGCGTTGTG      |
| Egf      | CCCGAATTCTCAAACAGAGG     | CCATCAGGAAGCAGAACAAATC   |
| Fbxo22   | GACAGTTCTCTACATGGCAGATT  | ACAATTCCCGGGGTCAACA      |
| Fgf-1    | AAAAGCCCCAACTGCTCTACTG   | GTATAAAAGCCCTTCGGTGTCC   |
| Fgf-2    | AAGCGGCTCTACTGCAAGAAC    | CATAGCAAGGTACCGGTTGG     |
| Fn1      | GCTTTGACAAATACACTGGGAAC  | CATTTCCAGACACAGACACTC    |
| Gadd45a  | GCAGAGCAGAAGACCGAAAG     | GCAGGCACAGTACCACGTTA     |
| Gapdh    | AAAGGGTCATCATCTCCGCC     | CTCGTGGTTCACACCCATCA     |
| Hgf      | AGTGTGCCAACAGGTGTATCAG   | GTCCCTTTATAGCTGCCTCCTT   |
| Icam-1   | GAGAGTGGACCCAACTGGAA     | GGGTGAGGTCTTGCTACT       |
| Igf-1    | CAGCTGGACCAGAGACCCCTT    | ATCACAGCTCCGGAAGCAAC     |
| Il-6     | GGATACCACTCCCAACAGACC    | TCCAGTTTGGTAGCATCCATC    |
| Il-8     | TCAAGAGCTACGATGTCTGTGT   | GGCCAACAGTAGCCTTCACC     |
| Itgb1    | CCTTCAATTGCTCACCTTGTTT   | CGATGATTAGCTGGATCACATTAC |
| Itgb3    | CCACACGAGGCGTGAAGTC      | CTTCAGGTTAC ATCGGGGTGA   |
| Itgb5    | GAAGTGCCACCTCGTGTGAA     | GGACCGTGGATTGCCAAAGT     |
| Itgb7    | ACCTGAGCTACTCAATGAAGGA   | CACCGTTTTGTCCACGAAGG     |
| Itgb8    | CTGAAGAAATA CCCCCTGGA    | ATGGGGAGGCATACAGTCT      |
| Lef1     | GTCAGACAAGCCCCGTCCT      | GCTGTTTCATATTGGGCATCATT  |
| Mgp      | GCTCCCTCTGGCCATCCT       | GCTTTAGCTCGCCACCTCT      |
| Mmp2     | ACCAGAACACCATCGAGACC     | TACTTTTAAGGCCCGAGCAA     |
| N-myc    | TCCTGGGAAGTGGGTTGGAG     | GACCGCCGAAGTAGAAGTCA     |
| Nox4     | CTTTTCATTGGGCGTCCTC      | GGGTCCACAGCAGAAAACTC     |
| Paxillin | ACTACTGCAACGGACCCATC     | TAGTGGACCTCACAGTACGG     |
| Pdgfr    | CTCCATCCGCTCCTTTGATG     | GATCGATGAGGTTCCGAGAGA    |
| Postn    | CTCAGCACTACTCCGATGTCTC   | TTAACCATGTGGCTGTGTAAGG   |
| Rankl    | AAACGCAGATTTGCAGGACT     | ACATCCAACCATGAGCCTTC     |
| Runx2    | GCGTCAAACAGCCTCTTCAG     | GTTGTTGCTGTTGCTGTTGT     |
| S100a13  | TGGTCTCTACTTTCTTCACCTTTG | TCACATCCAAGGTCTTCATCTTT  |
| Slc3a2   | CAGCTCCTACCTGTCAAATTCC   | TGGTAGAGTCGGAGAAGATGGT   |
| Smad4    | AGGACATTGATTCAAACCATC    | TTTCAAAGTAAGCAATGGAGCA   |
| Sox9     | AAGAACAAGCCACACGTCAA     | CGTTCTTCACCGACTTCCTC     |
| Tcf7     | ATCCTTGATGCTGGGATCTG     | CTTCTCTGCCTTGGGTTCTG     |
| Tgf-β1   | GTCAGACATTCGGAAGCAGT     | GGTCAGCAGCCGTTACCAAG     |
| Tsg-6    | CTGGCAGATACAAGCTCACCTAC  | GGGTATCCGACTCTACCCTTG    |
| Vegfa    | CCATGAACCTTCTGCTCTCTTG   | GTAGCTTCGCTGGTAGACATCC   |
| Vinculin | GCCAAGCAGTGCACAGATAA     | TTCTTTCTGGTGTGTGAAGC     |
| Wnt11    | CTGCACCTCTGGCGACCT       | CAGAAGTCAGGGGAGCTCTGT    |
| Wnt3     | AGCGTAGCAGAAGGTGTGAAG    | GTGGCCCCCTTATGATGTGAGT   |
| Wnt5a    | GTCTTTTGAGATGGGTGGTATC   | ACCTCTGGGTTAGGGAGTGTCT   |
| Wnt5b    | CCCCAGGCCAGAGAAAGC       | CCTCCCCGATGTAGGACAT      |
